# Supplementary material for: Evaluation of Traits for the Selection of Apis Mellifera for Resistance against Varroa Destructor
Source: MDPI journal article supplement (doi:10.3390/insects11090618), 2020-09-10
Supplement: s1 [file s1]

**Supplementary table 2.** Adjustment of the observations for the means from the models with interaction between season and apiary (sxa), season and apiary (s+a), season (s), apiary (a) or the overall mean (m); (no) means that a trait was not observed.

| trait   | Austria | Croatia | Germany |
|---------|---------|---------|---------|
| b3      | s+a     | m       | sxa     |
| b5      | s+a     | no      | no      |
| BINF    | sxa     | s+a     | sxa     |
| BINF1   | sxa     | m       | s       |
| BINF2   | sxa     | m       | s       |
| BINF3   | a       | m       | sxa     |
| BINF4   | sxa     | no      | no      |
| BINF5   | s       | no      | no      |
| BRINF   | s+a     | s+a     | sxa     |
| MF-OA   | no      | no      | sxa     |
| MPG     | sxa     | m       | sxa     |
| NMF     | a       | m       | sxa     |
| PIN     | sxa     | s+a     | s       |
| PINop   | s+a     | s+a     | s       |
| PIN1    | s+a     | s+a     | s       |
| PIN1op  | s+a     | s+a     | s       |
| PIN2    | a       | m       | s       |
| PIN2op  | a       | no      | sxa     |
| REC     | s+a     | s+a     | s       |
| RECinf  | s+a     | s       | s       |
| REC-SMR | no      | m       | no      |
| SMR     | s+a     | s       | sxa     |

<sup>1)</sup> REC-SMR represents 6 observations for REC and for SMR.
